# Supplementary material for: The Integrated mRNA and miRNA Approach Reveals Potential Regulators of Flowering Time in Arundina graminifolia
Source: MDPI journal article supplement (doi:10.3390/ijms24021699), 2023-01-15

**Supplementary Figure S1.** Comparison of flowering habit of bamboo orchid with seasonal flowering species.

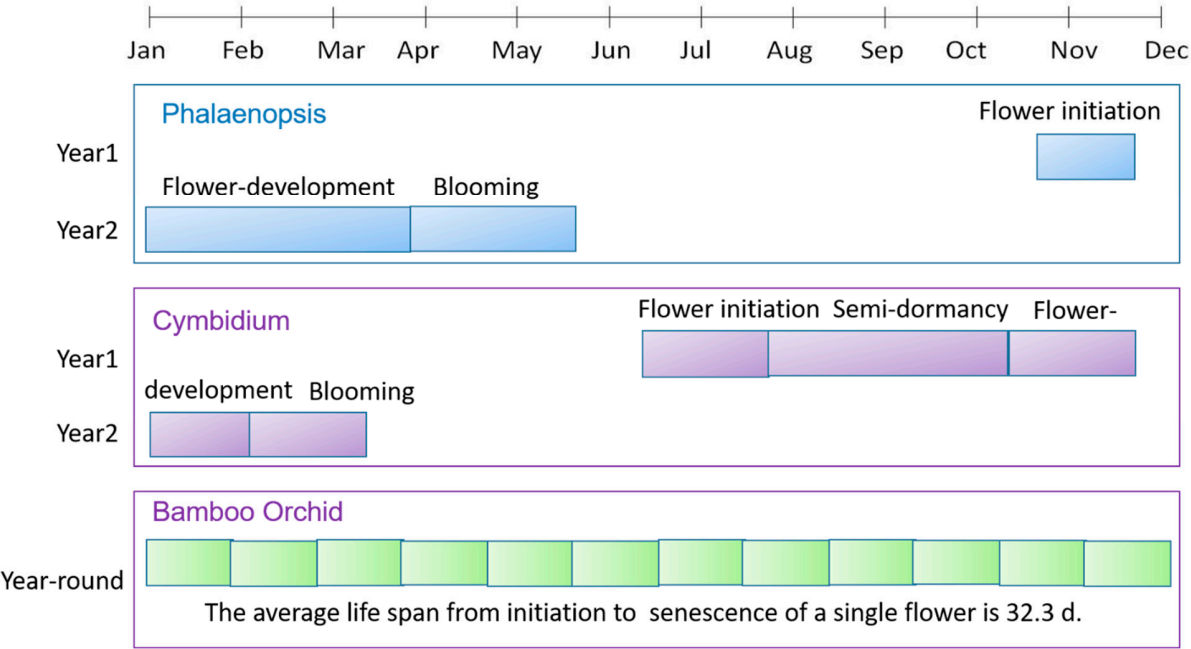

**Supplementary Figure S2** Stages of flower development in *Arundina graminifolia*. A: Stage 0 (IM: inflorescence meristem); B: Stage 1 (IM: inflorescence meristem, PP: petal primordia, SP: sepal primordia); C: Stage 2 (PP: petal primordia, SP: sepal primordia, LP: lip primordia, CP: carpel primordia); D-G: Stage 3; H-K: Stage 4; M-O: Stage 5; L: mature flower.

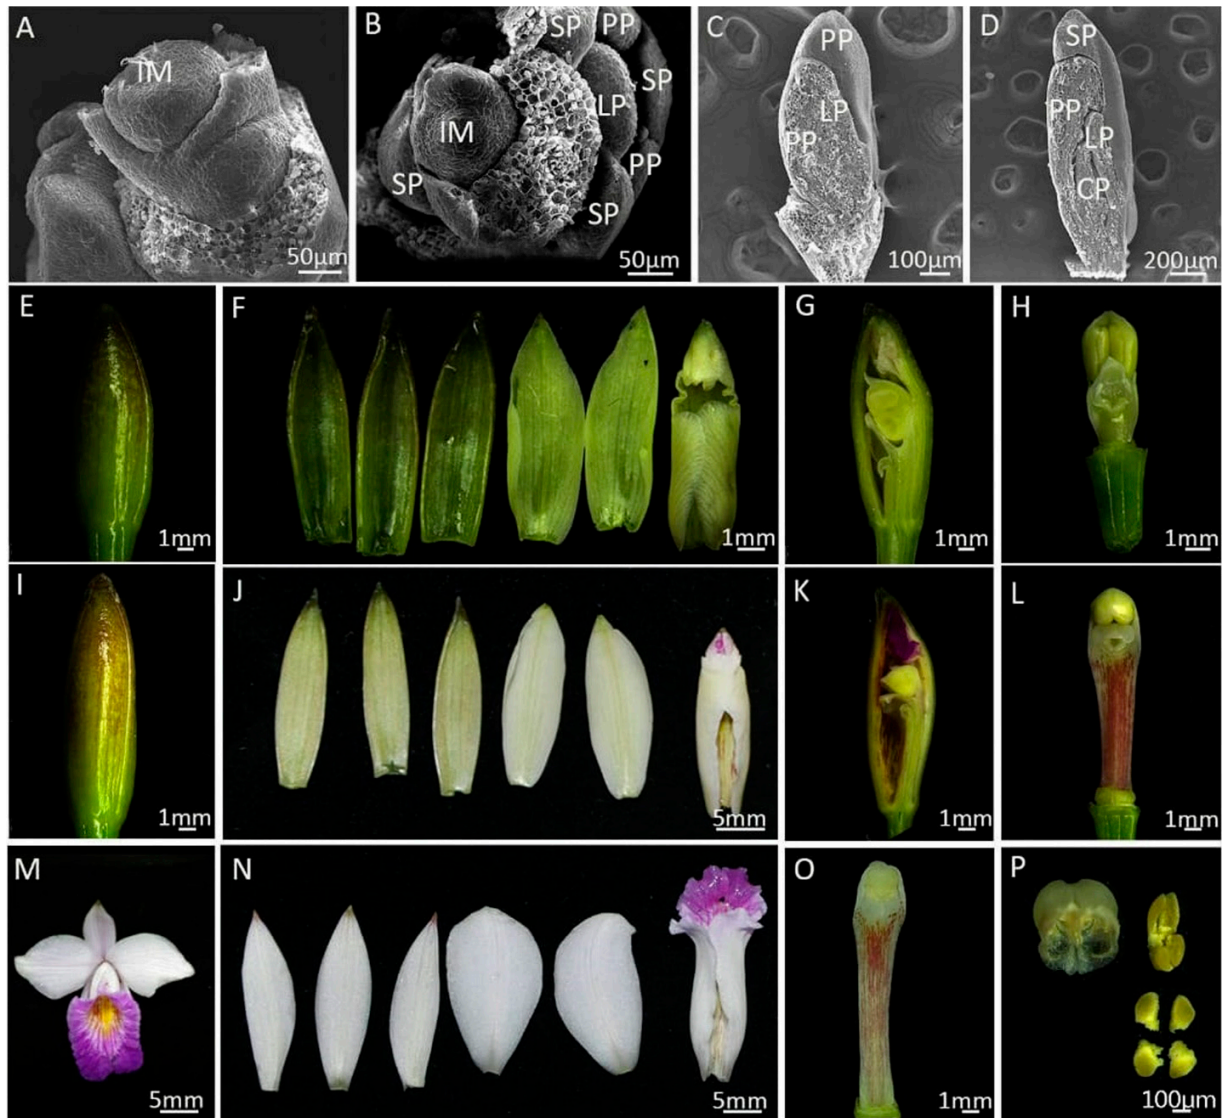

**Supplementary Figure S3** GO and KEGG annotation of Degradome sequencing and overview of conserved miRNA families. a: most popular GO and KEGG categories of Degradome sequences; b&c: relative abundance of GO and KEGG enrichment for Degradome sequencing.

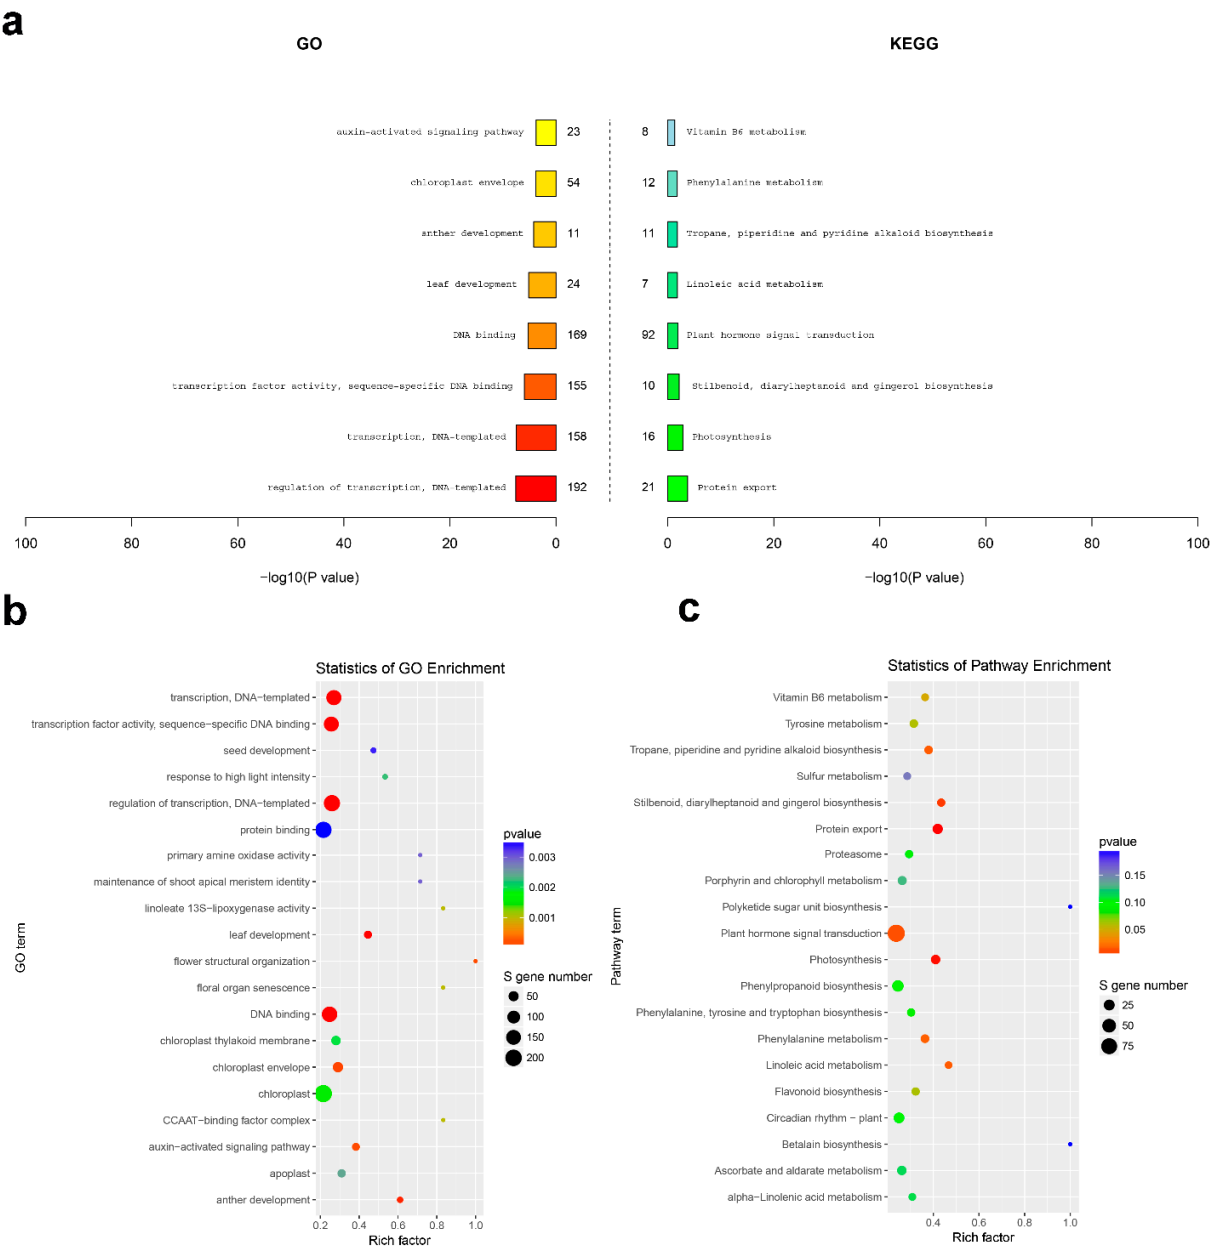

## Supplementary Figure S4 Categories of conserved miRNAs based on their biological process

|                                                                                                            |                                                                                                                                                                                                                                                                                                                                                                                                                                                                                                                                                                                                                                                            |
|------------------------------------------------------------------------------------------------------------|------------------------------------------------------------------------------------------------------------------------------------------------------------------------------------------------------------------------------------------------------------------------------------------------------------------------------------------------------------------------------------------------------------------------------------------------------------------------------------------------------------------------------------------------------------------------------------------------------------------------------------------------------------|
| MIR319 MIR159 MIR399 <br>MIR168 MIR166 MIR165 <br>MIR395 MIR164 MIR161 <br>MIR172 MIR160 MIR390 <br>MIR170 | Gene silencing by miRNA<br>Posttranscriptional gene silencing by RNA<br>Gene silencing by RNA<br>Posttranscriptional gene silencing<br>Gene silencing<br>Posttranscriptional regulation of gene expression<br>Regulation of gene expression, epigenetic<br>Negative regulation of gene expression<br>Negative regulation of macromolecule metabolic process<br>Negative regulation of metabolic process<br>Negative regulation of biological process<br>Regulation of gene expression<br>Regulation of macromolecule metabolic process<br>Regulation of metabolic process<br>Regulation of biological process<br>Biological regulation<br>Cellular process |
| MIR166 MIR164 MIR172 <br>MIR319 MIR160                                                                     | Organ development<br>System development<br>Anatomical structure development<br>Multicellular organismal development<br>Multicellular organismal process<br>Developmental process                                                                                                                                                                                                                                                                                                                                                                                                                                                                           |
| MIR164 MIR172 MIR160                                                                                       | Flower development<br>Reproductive structure development<br>Reproductive developmental process                                                                                                                                                                                                                                                                                                                                                                                                                                                                                                                                                             |
| MIR166 MIR164                                                                                              | MRNA cleavage involved in gene silencing by miRNA<br>MRNA cleavage<br>Nucleic acid phosphodiester bond hydrolysis<br>MRNA processing<br>MRNA metabolic process                                                                                                                                                                                                                                                                                                                                                                                                                                                                                             |
| MIR164 MIR160                                                                                              | Floral organ development<br>Petal development<br>Corolla development<br>Floral whorl development<br>Post-embryonic organ development                                                                                                                                                                                                                                                                                                                                                                                                                                                                                                                       |
| MIR399 MIR395                                                                                              | Cellular response to phosphate starvation<br>Cell communication<br>Cellular response to starvation<br>Response to external stimulus<br>Response to starvation<br>Cellular response to nutrient levels<br>Response to nutrient levels<br>Cellular response to external stimulus<br>Cellular response to extracellular stimulus<br>Response to extracellular stimulus                                                                                                                                                                                                                                                                                        |
| MIR319 MIR160                                                                                              | Leaf development<br>Shoot development<br>Shoot system development<br>Phyllome development                                                                                                                                                                                                                                                                                                                                                                                                                                                                                                                                                                  |
| MIR166 MIR172<br>MIR159 MIR160<br>MIR159 MIR164<br>MIR159                                                  | Tissue development<br>Response to abscisic acid stimulus<br>Negative regulation of cellular process<br>Negative regulation of abscisic acid mediated signaling<br>Regulation of abscisic acid mediated signaling pathway                                                                                                                                                                                                                                                                                                                                                                                                                                   |
| MIR164                                                                                                     | Specification of petal number<br>Specification of decreased petal number<br>Specification of organ number<br>Specification of floral organ number<br>Petal formation<br>Petal morphogenesis<br>Floral organ formation<br>Leaf senescence<br>Organ senescence<br>Floral organ morphogenesis<br>Post-embryonic organ morphogenesis                                                                                                                                                                                                                                                                                                                           |
| MIR160                                                                                                     | Sepal development<br>Flower calyx development<br>Regulation of anthocyanin biosynthetic process<br>Regulation of anthocyanin metabolic process<br>Regulation of flavonoid biosynthetic process<br>Regulation of secondary metabolic process<br>Auxin mediated signaling pathway                                                                                                                                                                                                                                                                                                                                                                            |
| MIR395                                                                                                     | Cellular response to auxin stimulus<br>Cellular response to sulfur starvation<br>Cellular response to sulfate starvation<br>Cellular anion homeostasis<br>Cellular di-, tri-valent inorganic anion homeostasis<br>Cellular phosphate ion homeostasis<br>Di-, tri-valent inorganic anion homeostasis<br>Phosphate ion homeostasis<br>Anion homeostasis                                                                                                                                                                                                                                                                                                      |
| MIR172<br>MIR408                                                                                           | Meristem determinacy<br>Response to copper ion                                                                                                                                                                                                                                                                                                                                                                                                                                                                                                                                                                                                             |

activities

**Supplementary Figure S5** Clustering analysis of conserved miRNAs; f: families of miRNAs. Color intensity shows the stronger correlation.

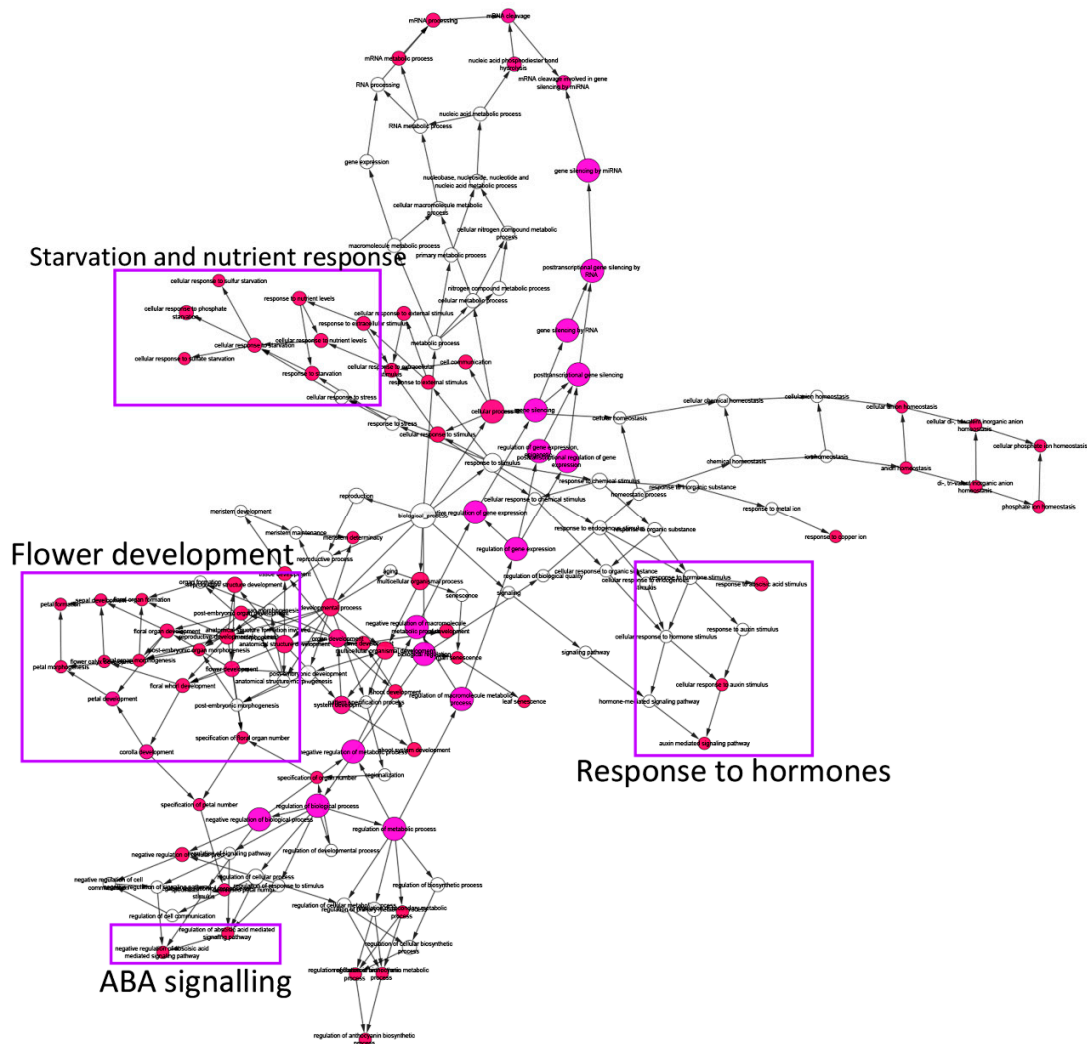

### Supplementary Figure S6 Families of miRNAs.

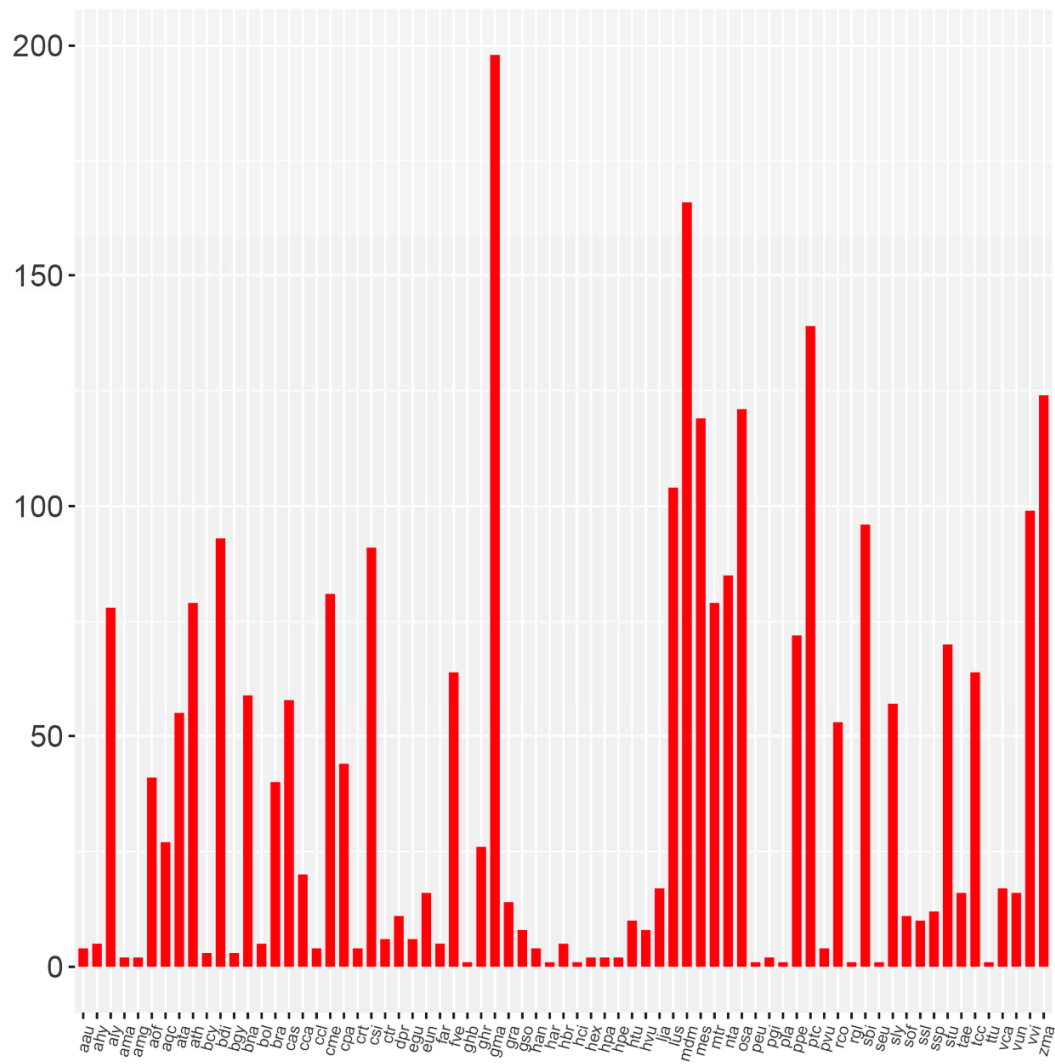

Supplement: s1 [file s1]
