# Supplementary material for: The Integrated mRNA and miRNA Approach Reveals Potential Regulators of Flowering Time in Arundina graminifolia
Source: Int J Mol Sci. 2023 Jan 15;24(2):1699. doi: 10.3390/ijms24021699 (PMC9865619; doi:10.3390/ijms24021699)
Supplement: Supplementary file 1 [file ijms-24-01699-s001.zip › Supplementary tables.xlsx]

## Sheet: Supplementary table S1
	Supplementary table S1. Summary of important miRNAs with their gene targets
		Log2 Expression
	Target ID	FD1	FD2	FD3	FD4	FD5	Root	Leaf	Flower	Silique	Stage_specific high expression	Gene name	Biological Process
miR156	56822	5.62732	6.19673	6.59096	5.05137	2.75489	0.286881	1.73552	0.01	3.48285	FD3	ATHB-5	ABA
	70131	-2.73697	3.85798	0.01	5.83517	0.01	0.01	0.01	-5.05889	-1	FD4	VP1	ABA
	74775	4.38681	4.70598	3.77716	4.66164	2.96901	4.20867	4.63401	4.44559	3.92505	FD2	GIGYF2	ABA
	70524	1.14405	-1.152	0.01	-2.18442	-4.05889	5.18547	4.27724	5.33128	0.01	Flower	FD	ABA
	71901	5.31216	5.70625	5.50906	3.85997	1.46989	2.488	2.5435	-0.666576	2.22959	FD2	TTL1	ABA
	67823	6.34926	7.97573	3.67356	-2.32193	-3.18442	4.32265	1.96347	-4.05889	-1.51457	FD2	wdr26	ABA+Aux+Eth
	58859	4.61706	4.80839	5.13668	4.70819	4.81455	5.04396	4.98368	4.63575	5.02414	FD3	MPK2	ABA+JA+Eth
	75113	3.51223	3.58856	4.43896	3.60407	4.20163	4.54535	4.09339	4.20945	3.60288	Root	ABCB20	Aux
	72662	4.75916	4.67016	4.44427	4.44758	5.02459	5.40259	6.1635	7.43346	5.2521	Flower	CRY1	Aux
	68334	4.1914	4.44692	3.47119	3.854	3.31179	3.37573	4.14649	3.81558	3.20945	FD2	Os05g0150500	Aux
	67185	5.64472	5.35014	4.96578	4.91361	4.51159	4.59694	3.90304	7.26294	4.6153	Flower	XTH4	Aux
	68564	-0.0892673	0.400538	2.10434	5.31397	1.84398	-0.152003	-2.18442	0.263034	2.40054	FD4	EBP1	Aux+G1/S
	61169	2.26003	1.98185	1.20789	0.847997	0.432959	1.42761	1.18903	1.23266	1.09761	FD1	H0219H12.4	CK
	71965	4.12598	3.86691	3.61471	3.12928	2.74846	4.13093	4.33271	3.774	3.94767	Leaf	RR22	CK
	58565	2.88753	2.28096	2.34483	2.91456	1.15704	2.80116	4.52168	5.10224	1.38957	Flower	RR9	CK
	73040	2.74846	1.31615	-1.02915	1.04963	0.389567	2.51854	3.17473	3.08406	0.526069	Leaf	HK5	CK+ABA+FD
	60754	2.18269	0.516015	3.25096	4.17552	0.594549	3.02503	5.87995	5.51191	4.01257	Leaf	GA2OX1	GA
	69034	1	1.9222	1.70929	1.40054	1.79077	-0.915936	-0.68966	0.475085	2.99458	Silique	ILL6	JA+Aux
	64894	3.80632	3.87971	3.5435	4.58135	5.11811	3.32912	4.66619	4.24108	4.42089	FD5	DIN4	Suc
	62612	4.88411	5.16631	2.72247	0.298658	-5.05889	-3.05889	1.63227	-3.8365	-0.971431	FD2	SPL18	AD
	64218	5.61824	5.91456	6.67948	5.31651	3.04439	4.32481	5.28651	1.92979	5.08491	FD3	SPL18	AD
	57774	5.43396	4.73715	1.35614	1.98914	1.14405	0.422233	3.45286	-0.862496	1.73985	FD1	TGA1	AD
	71558	4.852	4.94579	4.60229	4.1643	4.09255	4.72083	5.01167	4.68032	4.59216	Leaf	SEC10	AP
	63889	5.41988	5.19849	6.12143	5.96047	5.83188	7.26472	6.41667	6.60333	5.7148	Root	NAC029	FD
	68537	5.57864	5.51507	5.06393	4.67694	4.71534	5.22766	5.00405	5.37608	4.47444	FD1	BB	FD
	60103	0.01	0.01	0.01	-5.64386	0.01	0.01	0.01	0.01	0.01	FD4	GID1C	GA+FD
	71736	3.14568	1.65992	0.948601	0.111031	-1.35845	1.76977	-1	-6.64386	-0.556393	FD1	CDT1A	GD
	56114	1.43296	0.925999	-1.73697	-2.39593	-3.32193	-3.64386	1.77821	-1.73697	-1.2863	Leaf	MYB44	OBS
	68314	-2.47393	1.66448	3.30451	2.72901	5.91265	1.08406	0.01	2.08406	1.98185	FD5	EVN	PD
	64241	-0.810966	0.250962	0.01	-0.810966	0.01	3.98094	3.59455	-0.120294	0.613532	Root	GAM1	PD+ABA+GA
	71566	2.05658	4.28688	3.42089	4.69711	3.73444	3.75916	1.41684	2.04963	2.55582	FD4	GAM1	PD+ABA+GA
	52859	5.42122	5.84172	7.05918	6.0321	5.3875	3.27053	4.42761	3.38405	6.46287	FD3	BPE	PM
	57849	3.45943	3.53232	3.60407	2.89336	3.13586	5.60526	4.7126	5.12433	3.43029	Root	GAM1	PD
	61828	7.08683	7.28401	6.61692	5.15664	5.69822	3.14893	6.20065	4.40735	5.39541	FD2	SPL5	V--R
	68485	4.10936	3.83592	1.5656	2.3978	1.63227	2.59694	3.95791	3.17792	3.04614	FD1	SPL12	V--R
	62839	2.73769	2.05658	-2.55639	0.895303	-2.8365	-1.68966	2.97636	4.95093	-1.32193	Flower	HUB1	V--R
	57017	3.33914	1.41143	-0.395929	-1.47393	-2.94342	0.15056	1.42761	-3.8365	-1.73697	FD1	SPL17	V--R
	70681	3.14731	3.72465	2.18903	3.63691	1.33342	-2.12029	0.910733	0.485427	3.22805	FD2	ATH1	V--R+GA
miR157
	67823	6.34926	7.97573	3.67356	-2.32193	-3.18442	4.32265	1.96347	-4.05889	-1.51457	FD2	wdr26	ABA+Aux+Eth
	62612	4.88411	5.16631	2.72247	0.298658	-5.05889	-3.05889	1.63227	-3.8365	-0.971431	FD2	SPL18	AD
	64218	5.61824	5.91456	6.67948	5.31651	3.04439	4.32481	5.28651	1.92979	5.08491	FD3	SPL18	AD
	57774	5.43396	4.73715	1.35614	1.98914	1.14405	0.422233	3.45286	-0.862496	1.73985	FD1	TGA1	AD
	69586	4.87036	3.97269	0.124328	2.87774	0.62293	0.163499	1.61353	-0.761213	2.72465	FD1	TGA1-2	AD
	61828	7.08683	7.28401	6.61692	5.15664	5.69822	3.14893	6.20065	4.40735	5.39541	FD2	SPL5	V--R
	68485	4.10936	3.83592	1.5656	2.3978	1.63227	2.59694	3.95791	3.17792	3.04614	FD1	SPL12	V--R
	57017	3.33914	1.41143	-0.395929	-1.47393	-2.94342	0.15056	1.42761	-3.8365	-1.73697	FD1	SPL17	V--R
miR159
	59487	3.52607	4.46009	4.46532	1.87578	2.27202	2.59216	3.21101	-0.0588937	2.73985	FD3	4CLL7	Aux+JA
	72733	2.23266	3.23266	3.69488	3.65076	1.07724	1.97085	1.56071	1.85997	4.63169	Silique	ABCC5	ABA
	66922	4.40122	5.43429	6.92291	6.08385	4.4822	4.18349	4.65076	5.71177	4.43962	FD3	ACR4	CK
	56486	4.76924	4.85997	4.80684	4.20242	4.15866	5.10727	5.30779	6.6851	4.84046	Flower	ACR8	ABA
	72195	5.12143	4.84649	4.6865	4.60526	4.03474	4.22419	4.65019	3.96162	4.77189	FD1	ANX2	PTG
	63834	5.61176	6.24031	5.48123	4.32193	4.05398	2.72247	4.84097	2.83188	4.75702	FD2	ARF12	FD+Aux
	66760	4.43962	4.48349	4.76924	5.0505	3.84699	4.93216	5.78162	5.89579	4.36387	Flower	ARF16	Aux
	68764	5.26566	5.37434	4.72083	4.43829	4.11603	4.01436	4.62176	4.58916	4.23649	FD2	ARF23	FD+ABA+Aux
	59646	4.13175	5.01346	5.59096	4.8485	5.85823	4.92315	3.52607	2.60644	4.79442	FD5	ARP1	ABA
	59484	2.66221	2.54102	-1.25154	0.201634	2.71149	0.464668	2.14731	-2	2.6893	FD5	ATHB-40	Aux
	58528	5.46303	5.11728	5.09803	5.25096	4.22728	5.96694	5.49025	5.52826	6.46418	Silique	ATHB-5	ABA
	71579	4.22805	4.26529	3.57289	2.09424	1.81558	3.74093	2.49313	0.01	2.21101	FD2	BLH1	ABA
	66279	3.46728	3.52732	2.73552	3.08576	1.70929	3.04789	3.96809	3.43563	3.34199	Leaf	BLH3	V--R
	70482	4.83946	4.63923	4.14078	4.86987	3.04614	3.97269	3.55336	2.79701	3.44493	FD4	BRN1	FD
	72416	3.44493	2.87381	4.30232	3.64501	4.42089	4.56377	4.05745	4.62761	3.19692	Flower	BSL2	BR
	63094	-3.8365	0.01	0.01	0.01	0.01	0.01	0.01	0.01	0.01	FD1	BZR1	BR
	68709	3.37851	2.73985	1.774	0.536053	1.75702	4.01436	1.40599	4.96162	-0.0588937	Flower	CCR1	ABA
	60777	0.01	-2.18442	-2.18442	0.01	0.01	-2.18442	0.01	0.01	0.01	FD2	CCR4-1	Suc
	71636	3.78973	3.87774	3.25852	3.69153	3.42492	4.76765	3.56682	4.79597	4.51916	Flower	CKB4	CF
	57144	4.88899	4.57046	2.88947	2.58976	3.54102	3.14731	4.9982	6.45927	3.31179	Flower	CKX3	CK
	60677	6.25418	6.38957	5.19849	6.77729	7.7324	6.48107	7.66342	9.42425	7.15644	Flower	COL5	FD
	53883	-0.340075	-0.415037	-2.18442	5.95884	-1.59946	-0.268817	-0.915936	-0.340075	-0.494109	FD4	CSLC6	PTD
	60307	0.799087	0.978196	-0.577767	3.60288	-2.47393	-2.05889	-2.05889	0.298658	-0.286304	FD4	DIVARICATA	FD
	56129	3.81967	3.70819	2.82375	2.85997	2.79286	2.88557	3.8339	4.98231	3.53232	Flower	ERF003	Eth
	61058	4.85748	4.76765	5.13463	4.49889	4.43095	4.76075	4.21645	4.2149	4.81147	FD3	ERF053	Eth
	74410	4.13504	4.12184	3.62761	3.4489	3.26003	3.57168	4.47768	4.45943	4.04089	Leaf	FAB1B	PD
	74078	6.05115	5.7939	4.74416	4.49633	4.99458	5.7879	4.97911	4.75221	5.06566	FD1	FLXL3	FD
	55214	7.51798	7.32517	6.60866	6.15381	6.37365	7.64118	7.1631	6.84912	6.55244	Root	FRL3	FD
	57849	3.45943	3.53232	3.60407	2.89336	3.13586	5.60526	4.7126	5.12433	3.43029	Root	GAM1	PTG
	71566	2.05658	4.28688	3.42089	4.69711	3.73444	3.75916	1.41684	2.04963	2.55582	FD4	GAM1	ABA+GA
	56675	0.01	0.01	-1.55639	5.32409	7.90971	5.12722	1.19535	0.01	7.27268	FD5	GH3.8	Aux
	61482	2.90111	2.98732	3.22188	3.13258	0.545968	-1.25154	3.06695	4.44956	3.5472	Flower	HDG1	FOI
	64164	3.35191	2.43829	-1.51457	1.13093	0.01	0.0840643	-2.18442	-3.18442	-2.12029	FD1	HK2	CK
	55961	2.02148	1.69153	0.632268	-2.47393	-0.358454	1.56071	0.565597	1.64155	-2.47393	FD1	HY5	ABA+GA+C
	53406	3.1127	2.64616	0.356144	2.02148	0.0976108	3.37851	3.38128	3.04089	1.31034	Leaf	IAA11	Aux
	72950	2.21723	1.90304	1.20789	3.34341	1.73985	1.65076	0.31034	0.505891	2.37016	FD4	IAA11	Aux
	67422	5.22843	4.46271	1.54597	2.09085	2.66676	1.54102	6.09887	3.40735	2.39232	Leaf	IAA26	Aux
	57370	3.53854	3.34767	2.82375	1.926	3.11103	3.16832	4.19377	5.07253	2.55582	Flower	IDD14	Aux+FOM
	74150	0.01	0.01	-3.64386	0.01	-3.8365	0.01	0.01	-3.8365	0.01	FD3	KEG	ABA
	58674	2.71809	4.07125	4.89676	3.33628	3.52356	4.50335	5.14364	4.38819	3.59216	Leaf	KRP3	ABA
	58885	3.45549	2.01792	2.04963	2.78241	0.565597	2.20789	2.72465	2.28096	1.54597	FD1	LHY	CF+ABA+GA+JA
	53215	3.93923	3.82883	4.47119	3.40463	3.70044	3.83491	5.22188	4.22959	2.98003	Leaf	OHP1	C
	68334	4.1914	4.44692	3.47119	3.854	3.31179	3.37573	4.14649	3.81558	3.20945	FD2	Os05g0150500	Aux
	52665	3.44626	3.0036	2.14078	2.95233	2.49825	2.01792	2.66903	3.05311	3.70377	Silique	Os05g0572700	ABA
	70435	5.64212	5.22226	3.64501	4.1235	4.06264	4.56071	5.37643	5.31796	4.52982	FD1	Os06g0130600	Eth
	69229	-0.514573	-0.473931	1.70487	1.8679	0.545968	-1.88897	-2.47393	-2.8365	1.59455	FD4	Os06g0694000	FD+C
	74933	2.65076	2.41143	2.42761	2.11103	2.63459	3.47638	3.70819	3.83491	2.4489	Flower	Os07g0555200	ABA
	66260	4.38128	4.45549	3.11437	3.65992	4.01078	3.26003	4.2891	4.61412	4.69877	Silique	Os11g0547000	FD
	57512	4.11936	2.23266	-3.47393	2.23879	-6.64386	-2.64386	1.12433	0.01	-3.18442	FD1	PPCK1	ABA
	61668	3.41954	3.54102	0.485427	1.0635	-2.12029	0.01	0.475085	-1.152	0.641546	FD2	ROC3	FOI
	71965	4.12598	3.86691	3.61471	3.12928	2.74846	4.13093	4.33271	3.774	3.94767	Leaf	RR22	CK
	66798	3.73335	3.71918	4.05572	3.0036	3.52356	4.17313	4.08151	4.58916	3.50462	Flower	RVE8	ABA+GA+Aux+JA+F
	71581	6.40684	6.15664	5.15947	4.03738	3.0054	2.89918	5.25965	3.76553	3.40599	FD1	RWA2	ABA
	55982	3.58736	3.58135	4.27575	3.69711	3.24489	3.3799	3.42089	3.62527	3.78764	FD3	SCL6	SAM
	66898	6.28522	6.507	7.83719	7.68657	7.48631	6.86406	7.08704	7.08555	7.73057	FD3	SCL6	SAM
	69935	4.83946	5.25134	6.31198	4.71205	1.86394	3.49825	4.62936	2.32769	4.06781	FD3	SF21	Aux
	55379	1.03562	1.92979	2.59932	3.50843	1.59932	3.29278	4.34979	3.58015	2.52356	Leaf	SHI	GA+Aux
	54541	4.48543	4.46989	4.46532	4.37226	4.0268	5.00045	3.41007	5.04614	4.54844	Flower	TCP24	LM
	59889	5.87676	5.98003	5.83137	5.15259	5.81737	4.04614	4.19535	5.92529	5.6946	FD2	TCP24	LM
	53970	0.01	0.01	0.01	0.01	0.01	0.01	0.01	0.01	0.01	FD1	TCP3-1	Aux
	55297	1.29278	1.09085	-1.47393	0.970854	3.75809	4.51223	4.19535	2.58256	1.774	Root	TCP3-2	Aux
	57774	5.43396	4.73715	1.35614	1.98914	1.14405	0.422233	3.45286	-0.862496	1.73985	FD1	TGA1	AD
	61849	4.5008	4.51286	4.80839	4.15137	4.36737	4.42021	3.87283	4.48091	4.59515	FD3	TIC	ABA+C
	62625	1.19535	1.74846	3.80219	5.33199	3.9991	3.69822	0.189034	-1.12029	4.31759	FD4	TIFY10A	JA
	70524	1.14405	-1.152	0.01	-2.18442	-4.05889	5.18547	4.27724	5.33128	0.01	Flower	TIFY6A	JA
	62357	5.69933	7.53029	7.75255	4.71149	4.15218	4.83946	4.67243	5.33807	4.81865	FD3	TIFY6B	JA
	74819	5.49153	5.65335	4.9782	4.59574	4.79181	5.30779	6.62527	5.854	5.49985	Leaf	UVR8	C
	54094	3.33342	3.01436	1.852	2.16993	1.73118	2.18903	2.7866	2.62994	2.59932	FD1	VIP2	FD
	65019	3.97269	3.70044	3.37712	3.10434	2.88166	3.77083	3.854	3.70929	3.48543	FD1	VIP2	FD
	70131	-2.73697	3.85798	0.01	5.83517	0.01	0.01	0.01	-5.05889	-1	FD4	VP1	ABA
	57286	1.69153	1.63691	2.78869	2.31615	2.848	2.26003	1.63227	1.30451	2.87578	Silique	VP15	Aux
	67185	5.64472	5.35014	4.96578	4.91361	4.51159	4.59694	3.90304	7.26294	4.6153	Flower	XTH4	Aux
	56325	6.69697	5.60021	2.41143	2.56316	0.356144	-3.8365	4.36317	0.01	0.0703893	FD1	YAB4	FD+IM+SAM
	71413	6.65907	5.11061	3.96347	3.61117	1.24489	0.01	3.32481	-2.25154	2.49313	FD1	YAB4	FD+FOI+SAM
miR169
	75079	3.01257	2.33628	-1.2863	3.33199	0.238787	2.22342	4.10518	2.56071	2.63459	Leaf	UK	CK
	57613	2.86592	3.40463	2.50335	4.05745	1.04963	0.584963	-0.152003	-1.4344	2.15381	FD4	AGL65	PD
	67942	2.76341	3.70819	3.91743	2.75702	1.54102	4.89482	2.74201	2.70266	1.81558	Root	ARF9	Aux
	57268	6.02192	5.23993	3.15381	3.52732	4.5373	4.65191	7.08736	1.99277	4.63517	Leaf	CAMBP25	SA
	72662	4.75916	4.67016	4.44427	4.44758	5.02459	5.40259	6.1635	7.43346	5.2521	Flower	CRY1	C+St
	68530	3.93829	3.75275	3.59574	2.18903	2.52857	3.24793	1.22651	0.275007	3.01078	FD1	E2FA	Aux
	58911	1.57046	1.58496	3.32048	2.59694	0.782409	4.1152	2.05311	0.748461	2.35896	Root	GAST1	GA+Suc
	68277	4.8674	4.97774	4.51602	3.97545	3.91648	3.36737	4.59634	4.20555	3.80632	FD2	GSH1	FD+JA
	71453	4.8525	4.86344	3.98732	4.35262	3.87184	4.4019	5.43196	5.2292	4.19535	Leaf	KS1	GA
	55965	0.01	0.01	0.01	0.01	-0.810966	4.53978	0.01	0.01	0.01	Root	LE	GA
	53510	3.70377	3.63343	4.93263	5.26115	4.50016	5.14078	4.6565	5.34979	5.41785	Silique	LPPD	ABA
	72367	1.79077	1.74416	3.54102	0.659925	-1.55639	1.76129	0.956057	1.7866	-0.0588937	FD3	MED15A	SA
	68261	-1.55639	-1.64386	-1.25154	5.05745	1.61353	0.01	0.01	-1.12029	5.06824	Silique	ML4	MD
	64048	4.92695	4.88801	6.03144	4.78973	5.15664	5.2407	4.22419	4.77189	4.95652	FD3	MMS21	CK+MD
	69728	5.01748	5.69153	3.76871	2.73118	1.73985	3.24489	2.97636	3.1635	2.30743	FD2	MND1	PD
	58150	3.95233	3.81865	2.81147	5.16269	1.23266	-0.454032	3.20006	0.01	3.24336	FD4	MOB1A	Aux
	56365	3.49313	1.86394	-4.64386	0.01	0.01	0.01	-0.200913	0.01	-0.577767	FD1	NAC031	MI
	53390	2.82782	1.39506	1.79494	2.39506	1.1177	4.19298	3.78869	3.1127	1.70044	Root	NFYA2	DF
	73660	-0.643856	3.57894	4.38681	2.73985	3.61589	1.67807	4.25096	2.19535	3.34767	FD3	PTI6	CK+Eth
	57438	5.62527	5.53356	6.2666	5.3837	5.22188	4.89385	4.88801	5.06393	5.59096	FD3	PTI6	CK+Eth
	68351	3.26003	2.79701	1.87971	2.95233	1.38405	-1.73697	3.43563	4.90207	0.15056	Flower	SUS5	Suc
	71901	5.31216	5.70625	5.50906	3.85997	1.46989	2.488	2.5435	-0.666576	2.22959	FD2	TTL1	ABA
miR171
	67690	0.01	0.01	-5.05889	0.01	0.01	0.01	0.01	0.01	0.01	FD3	SCL6	SAM
miR172
	70310	3.47379	4.92267	4.14078	3.61941	5.07339	3.89821	4.58976	1.29866	4.55766	FD5	AP2	FOI
	74811	5.17113	5.03562	4.8846	4.09001	3.55704	4.77241	4.68594	3.72574	4.69265	FD1	ARF1	Aux
	66052	6.92955	7.14456	7.04505	6.42475	6.45697	6.90605	7.07671	6.29719	6.95315	FD2	ASK7	Aux+BR
	64213	5.34873	5.44493	4.59335	4.73444	4.33771	4.97361	5.40361	4.95187	5.14119	FD2	At2g40430	T.G2/M
	53128	0.01	0.01	-4.05889	0.01	0.01	0.01	0.01	0.01	0.01	FD3	BZIP06	PD
	56703	4.7447	5.57228	6.08725	2.63227	-2.05889	3.04963	2.5435	-2.47393	0.0703893	FD3	CDI	PTG
	64222	1.45943	-0.556393	0.650765	2.63923	3.22959	1.95233	2.09424	4.63169	4.81609	Silique	CYP707A5	ABA
	61639	5.75382	6.16571	4.90207	5.81992	6.29149	3.68482	3.99548	5.23573	5.74551	FD5	HD3A	V--R
	68448	3.64039	3.57289	3.03738	2.66448	2.57046	3.56803	3.80012	3.76765	3.33199	Leaf	HULK2	FD
	53724	0.01	0.01	-4.05889	0.01	0.01	0.01	0.01	0.01	0.01	FD3	IP5P1	ABA
	58959	0.01	-3.8365	-3.8365	0.01	-4.05889	0.01	0.01	0.01	0.01	FD2	LBD6	PD
	55965	0.01	0.01	0.01	0.01	-0.810966	4.53978	0.01	0.01	0.01	Root	LE	GA
	57824	-3.32193	-5.64386	-4.05889	-2.18442	-4.05889	3.83188	-3.8365	-2.8365	-4.32193	Root	LYK3	ABA
	69605	5.61853	5.21994	5.35226	5.0045	5.478	5.88313	5.72492	5.43596	5.2521	Root	MED25	FD+JA
	67550	5.44195	3.55336	3.7301	4.82222	-0.666576	6.81031	6.73322	8.3716	2.29866	Flower	NAC021	SAM+Aux
	63437	1.93734	1.97453	2.48543	2.10769	2.25701	1.39506	2.22651	2.33914	2.4489	FD3	NIN1	Suc
	70434	1.64155	-0.168123	0.62293	0.0143553	-1.78588	4.06437	4.13586	0.443607	2.12433	Leaf	NPF5.2	ABA+JA+SA
	65748	0.01	0.01	0.01	0.01	0.01	-5.64386	0.01	0.01	0.01	Root	OBE4	EMI
	75520	0.01	0.01	-2.94342	0.01	-3.18442	0.01	0.01	0.01	0.01	FD3	Os09g0247700	Aux
	55821	3.56438	3.66107	1.92979	3.20163	2.93923	4.36807	1.04963	1.44361	3.57168	Root	RAP2-7	FD
	72033	4.03386	2.35332	4.63633	4.6792	4.27426	4.94392	3.59813	4.46858	6.75195	Silique	RAP2-7	FD
	72844	4.55643	4.26454	4.43162	4.29205	4.98641	4.67129	4.3978	4.29572	5.16108	Silique	RR21	CK+Eth
	69134	6.05485	6.67172	7.01	7.36772	6.56651	4.81506	5.83517	4.42962	7.77314	Silique	SAD3	JA+SA
	67815	8.33789	8.51021	4.58376	4.97361	7.31633	7.28827	9.18696	9.78157	6.37452	Flower	SEU	FD+GD+Aux
	66726	4.20555	3.8268	4.38059	4.73498	3.8846	3.38128	4.36737	4.74524	3.8953	Flower	SHH1	GSR
	65936	0.01	-6.64386	-3.8365	0.01	0.01	-6.64386	0.01	0.01	0.01	FD3	SUT3	Suc
	75171	5.06307	4.65821	3.65076	3.62877	3.18745	2.96717	5.29057	4.78869	4.62527	Leaf	SYD	FD+JA+Eth
	57643	0.01	0.01	-3.64386	0.01	0.01	0.01	0.01	0.01	0.01	FD3	TTL1	ABA
	74992	0.0703893	3.80012	-4.05889	4.44228	0.01	3.38405	0.83996	0.01	-2.55639	FD4	WRI1	ABA+OM+Eth
	55663	7.89276	7.93723	9.05664	8.6725	9.16136	8.2076	7.51057	7.97447	9.182	Silique	WRKY6	Eth
miR319
	71566	2.05658	4.28688	3.42089	4.69711	3.73444	3.75916	1.41684	2.04963	2.55582	FD4	GAM1	ABA+GA
	55297	1.29278	1.09085	-1.47393	0.970854	3.75809	4.51223	4.19535	2.58256	1.774	Root	TCP3	Aux
	57286	1.69153	1.63691	2.78869	2.31615	2.848	2.26003	1.63227	1.30451	2.87578	Silique	VP15	Aux
	64883	-5.05889	0.01	0.01	0.01	0.01	0.01	0.01	0.01	0.01	FD1	PIN1A	Aux
miR390		0.01	0.01	0.01	0.01	0.01	0.01	0.01	0.01	0.01
	73539	2.50335	2.1635	1.90689	5.11562	0.526069	2.03914	1.50589	1.41143	1.30451	FD4	MSP1	AD+SG
miR393
	66922	4.40122	5.43429	6.92291	6.08385	4.4822	4.18349	4.65076	5.71177	4.43962	FD3	ACR4	CK
	66622	3.26303	2.76977	1.52105	4.49121	3.80529	5.81583	1.852	3.37712	3.21101	Root	CPK28	ABA
	65339	3.29719	3.71699	3.66448	3.43296	2.58015	3.33485	3.34767	3.26153	2.58256	FD2	EVN	PTC
	73003	3.70598	2.35614	1.23879	-0.415037	-0.971431	3.92979	4.38198	4.79286	-0.971431	Flower	fluG	ABA
	54661	3.77926	3.04089	2.70487	0.411426	-1.32193	2.15056	2.79909	2.23879	-0.454032	FD1	IAA10	Aux+EPS
	59149	2.01078	1.60881	0.432959	3.46597	1.12433	3.37712	3.29131	4.3799	3.14078	Flower	IAA31	Aux
	59747	7.26744	7.25984	7.21791	6.80568	6.78895	6.35878	6.58811	6.86419	6.97591	FD1	NIC1	ABA
	68334	4.1914	4.44692	3.47119	3.854	3.31179	3.37573	4.14649	3.81558	3.20945	FD2	Os05g0150500	Aux
	66226	3.5008	3.32769	3.44626	4.08406	3.60407	4.3799	3.61824	3.18903	3.78555	Root	PBL7	BR
	74819	5.49153	5.65335	4.9782	4.59574	4.79181	5.30779	6.62527	5.854	5.49985	Leaf	UVR8	C
miR399
	65355	6.74819	7.28364	7.38232	8.17727	6.22304	4.63459	6.05159	5.61265	5.62147	FD4	Actin-like protein	Aux
	75113	3.51223	3.58856	4.43896	3.60407	4.20163	4.54535	4.09339	4.20945	3.60288	Root	ABCB20	Aux
	70395	3.02503	2.03562	3.14241	2.68032	2.69377	4.75328	3.55704	3.94953	1.9222	Root	CRK5	ABA
	56300	0.01	0.01	0.01	-4.05889	0.01	0.01	0.01	0.01	0.01	FD4	CTL1	CK+SA+Eth
	61170	4.60229	4.52293	3.71918	3.47768	3.87578	4.44956	4.75809	5.57259	3.88947	Flower	FLXL2	FD
	74078	6.05115	5.7939	4.74416	4.49633	4.99458	5.7879	4.97911	4.75221	5.06566	FD1	FLXL3	FD
	54086	5.16832	4.90256	4.72028	0.695994	-2.64386	-0.454032	-0.434403	-1.05889	-0.120294	FD1	GAST1	Suc
	72178	5.69404	5.92077	7.86307	7.18715	5.2292	4.39369	5.02503	0.378512	6.12701	FD3	HUA2	V--R
	53833	3.64155	3.63227	3.29866	2.93734	2.55582	3.31034	3.49825	3.81967	3.0018	Flower	ICMT	FD+SAM
	69491	4.59276	4.97131	4.51475	5.32553	3.75596	4.43962	4.53792	4.10266	3.8846	FD4	MMK1	ABA+Eth+ID
	56365	3.49313	1.86394	-4.64386	0.01	0.01	0.01	-0.200913	0.01	-0.577767	FD1	NAC098	SAM+T.OF
	59072	4.34056	4.13668	3.75809	3.49825	3.58256	4.29425	3.35191	3.48027	3.77505	FD1	VIP3	FD
	69503	5.82629	6.13258	6.27016	5.41583	5.26003	6.26604	6.24641	5.61736	5.4446	FD3	ZAR1	PT

## Sheet: Supplementary table S2
		Supplementary Table S2 Primers used for qRT-PCR
		Name	Sequence
	1	GA20ox-F	TTACTTCTCCAACGCTCTCGG
		GA20ox-R	ACGTCAGCTCCGGTTTCTGA
	2	GID1-F	ACCCTTGTGCCTATGACGAC
		GID1-R	CGCCAAACAACGGATTGAGG
	3	TCP3-F	GCCTCTCCCTCCAATCGTTC
		TCP3-R	TTCCACGAAGCCGCTCTATG
	4	GI-F	ATGGCCCTGATGTGGAATGG
		GI-R	GGCATGCTTCAGATGGACTTC
	5	VIL2-F	GCTGAGCCAACTGGTACACT
		VIL2-R	CTTCTTCTTCTGCTGGGCGA
	6	FCA-F	GGGGATGCGATCAGCCATTA
		FCA-R	CTGACTGCGGACTAAGTGGG
	7	FPA-F	TGGTTACCCACCAGAGTTGC
		FPA-R	TCCTTCTTTAGCACGACGGG
	8	FRI-F	TGAAATCAGTTGCCAAGTGCG
		FRI-R	AGGTGTGTGTTGGGATGCTG
